# Supplementary material for: The effect of growing time and Mn concentration on the defect structure of ZnO nanocrystals: X-ray diffraction, infrared and EPR spectroscopy
Source: Royal Society of Chemistry journal article supplement (doi:10.1039/c6ra04071c), 2016-01-01
Supplement: c6ra04071c1.pdf [file c6ra04071c1.pdf]

## Supplementary Material

### The effect of growing time and Mn concentration on the defect structure of ZnO nanocrystals: X-ray Diffraction, Infrared and EPR Spectroscopy

Saadet Yildirimcan<sup>1</sup>, Kasim Ocakoglu<sup>1,2,\*</sup>, Selma Erat<sup>3</sup>, Fatih M. Emen<sup>4</sup>,  
Sergej Repp<sup>5</sup>, Emre Erdem<sup>5,\*</sup>

<sup>1</sup>Advanced Technology, Research and Application Center, Mersin University, TR-33343, Mersin, Turkey

<sup>2</sup>Department of Energy Systems Engineering, Faculty of Technology, Mersin University, TR-33480 Tarsus, Mersin, Turkey.

<sup>3</sup>Faculty of Engineering, Department of Electrical-Electronics Engineering, Toros University, TR-33140 Mersin, Turkey

<sup>4</sup>Faculty of Arts and Sciences, Department of Chemistry, Mehmet AkifErsoy University, TR-15030 Burdur, Turkey

<sup>5</sup>Institut fürPhysikalischeChemie, Albert-Ludwigs-Universität Freiburg, Albertstr. 21, 79104 Freiburg, Germany

\*Corresponding authors: kasim.ocakoglu@mersin.edu.tr, emre.erdem@physchem.uni-freiburg.de

Table S1. The concentration of Mn (mol) used, concentration of Mn detected by EDX (%), and ICP-MS (ppm)

|           | Concentration of Mn used (mol) | Concentration of Mn (%) (EDX) | Concentration of Mn (ppm) (ICP-MS) |
|-----------|--------------------------------|-------------------------------|------------------------------------|
| <b>X2</b> | $5 \times 10^{-4}$             | 0.13                          | 665                                |
| <b>X3</b> | $10 \times 10^{-4}$            | 0.14                          | 1072                               |
| <b>X4</b> | $25 \times 10^{-4}$            | 0.24                          | 2632                               |
| <b>X5</b> | $75 \times 10^{-4}$            | 0.29                          | 5384                               |
| <b>X6</b> | $100 \times 10^{-4}$           | 0.79                          | 6473                               |
| <b>X7</b> | $250 \times 10^{-4}$           | 2.00                          | 15300                              |

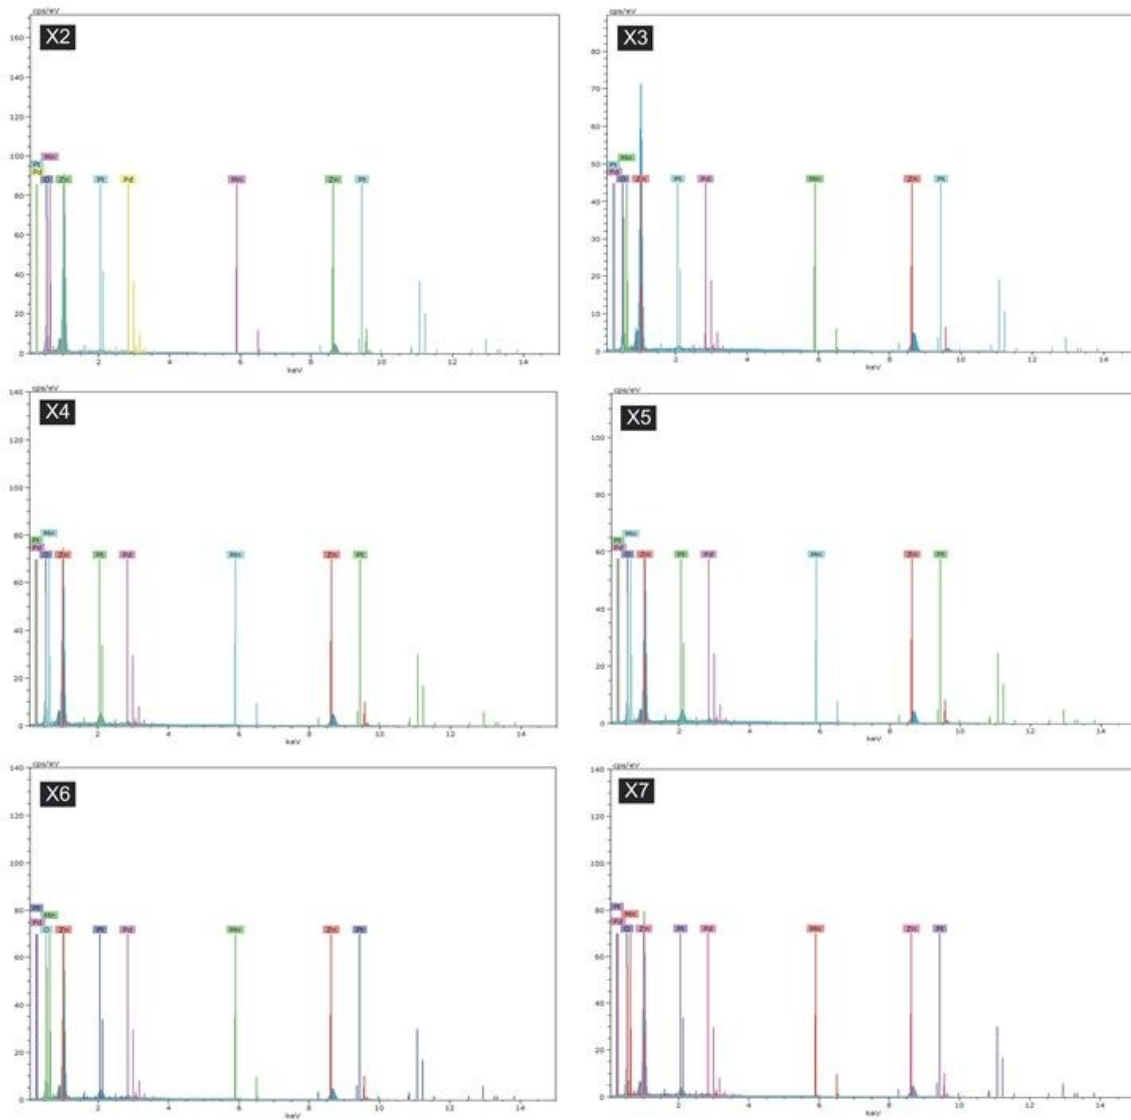

**Figure S1.** EDX spectra of Mn doped ZnO nanopowders.
